## Correction for: Circular RNA hsa\_circ\_0000515 acts as a miR-326 sponge to promote cervical cancer progression through up-regulation of ELK1

Qiu Tang<sup>1,\*</sup>, Zhigang Chen<sup>1,\*</sup>, Liangping Zhao<sup>2</sup>

<sup>1</sup>Department of Oncology, The Central Hospital of Wuhan, Tongji Medical College, Huazhong University of Science and Technology, Wuhan 430014, China

<sup>2</sup>Department of Gynecology and Obstetrics, Wuhan Central Hospital, Wuhan 430014, China

\*Co-first authors

Correspondence to: Liangping Zhao; email: [zhaoliangping@foxmail.com](mailto:zhaoliangping@foxmail.com)

Original article: [Aging \(Albany NY\) 2019; 11: 9982-9999](#).

PMID: 31772143

PMCID: PMC6914414

doi: [10.18632/aging.102356](https://doi.org/10.18632/aging.102356)

**This article has been corrected:** The authors requested to add Hai Xu, as a corresponding author to the author's list. This author was deleted during the proofreading of the article by mistake.

This correction does not change the content of the publication.

The correct list of authors and affiliations is provided below:

Qiu Tang<sup>1,\*</sup>, Zhigang Chen<sup>1,\*</sup>, Liangping Zhao<sup>2</sup>, Hai Xu<sup>3</sup>

<sup>1</sup>Department of Oncology, The Central Hospital of Wuhan, Tongji Medical College, Huazhong University of Science and Technology, Wuhan 430014, China

<sup>2</sup>Department of Gynecology and Obstetrics, Wuhan Central Hospital, Wuhan 430014, China

<sup>3</sup>Department of Obstetrics and Gynecology, Huangjiahu Hospital, Hubei University of Chinese Medicine, Wuhan 430065, China

\*Co-first authors

Correspondence to: Hai Xu; email: [xuhaihjh@126.com](mailto:xuhaihjh@126.com)
